# Supplementary material for: Effect of adenosine monophosphate on visible-light driven nicotinamide mononucleotide reduction in a system of water-soluble zinc porphyrin and colloidal rhodium nanoparticles
Source: Royal Society of Chemistry journal article supplement (doi:10.1039/d3nj04875f), 2023-11-21
Supplement: d3nj04875f1.pdf [file d3nj04875f1.pdf]

## Supporting information

### **Effect of adenosine monophosphate on the visible-light driven nicotinamide mononucleotide reduction with the system of water- soluble zinc porphyrin and colloidal rhodium nanoparticles**

Kazuma Suehiro<sup>a</sup> and Yutaka Amao<sup>a,b\*</sup>

<sup>a</sup> Graduate School of Science, Osaka Metropolitan University, 3-3-138 Sugimoto,  
Sumiyoshi-ku, Osaka 558-8585, Japan

<sup>b</sup> Research Centre of Artificial Photosynthesis (ReCAP), Osaka Metropolitan University,  
3-3-138 Sugimoto, Sumiyoshi-ku, Osaka 558-8585, Japan,

Email: amao@omu.ac.jp

**1. UV-Vis absorption spectra of various 1,4-NMNH concentrations and the relationship between 1,4-NMNH concentration and absorbance at 340 nm**

Figure S1 shows UV-Vis absorption spectra of various 1,4-NMNH concentrations. Inset shows the relationship between 1,4-NMNH concentration and absorbance at 340 nm.

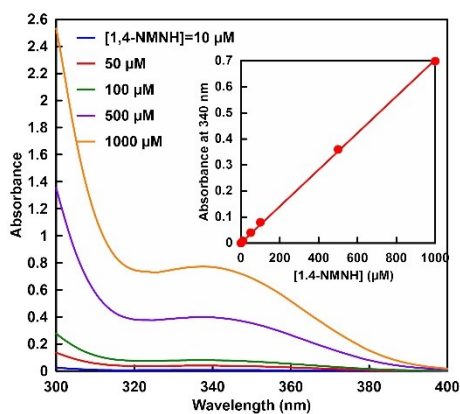

**Figure S1.** UV-Vis absorption spectra of various 1,4-NMNH concentrations (10 – 1000 μM). Inset shows the relationship between 1,4-NMNH concentration and absorbance at 340 nm.

## 2. Visible-light driven reduction of $\text{NMN}^+$ in the system of TEOA, ZnTPPS and Rh-PVP in the presence of AMP

Figure S2 shows the time dependence of UV-vis absorption spectra changes in the sample solution consisting of TEOA, ZnTPPS, Rh-PVP and  $\text{NMN}^+$  with the irradiation in the presence of AMP (0 – 2.5 mM). In set shows the different UV-vis absorption spectra changes of sample solution from 0 min irradiation.

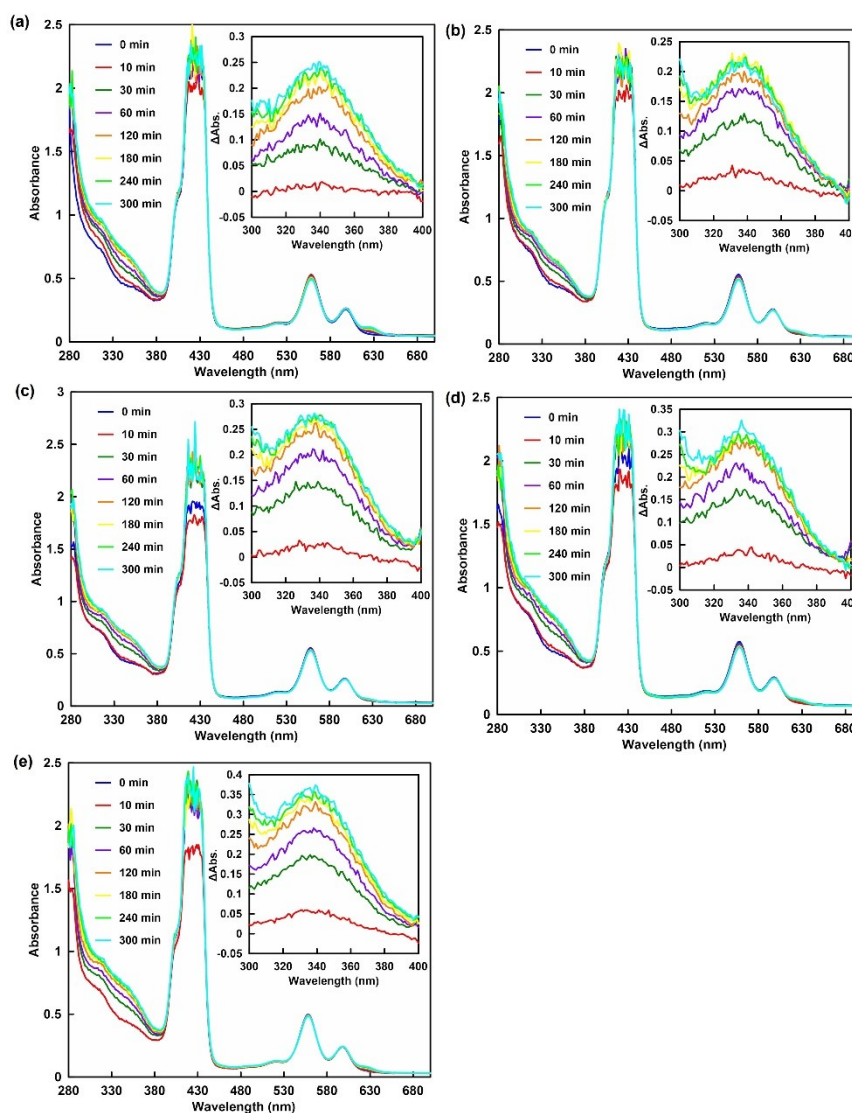

**Figure S2.** UV-vis absorption spectra changes in the sample solution consisting of TEOA, ZnTPPS, Rh-PVP and  $\text{NMN}^+$  with the irradiation in the presence of AMP. AMP concentration: 0 (a), 0.5 (b), 1.0 (c), 1.5 (d) and 2.0 mM (e).
